# Supplementary material for: Carbon nanotube reinforced polypyrrole nanowire network as a high-performance supercapacitor electrode
Source: Royal Society of Chemistry journal article supplement (doi:10.1039/c3ta12844j), 2013-01-01
Supplement: c3ta12844j.pdf [file c3ta12844j.pdf]

## Supplementary Information

### Carbon nanotubes reinforced polypyrrole nanowires network as high-performance supercapacitor electrode

Hai Fu, Zhongjie Du, Wei Zou, Hangquan Li and Chen Zhang\*

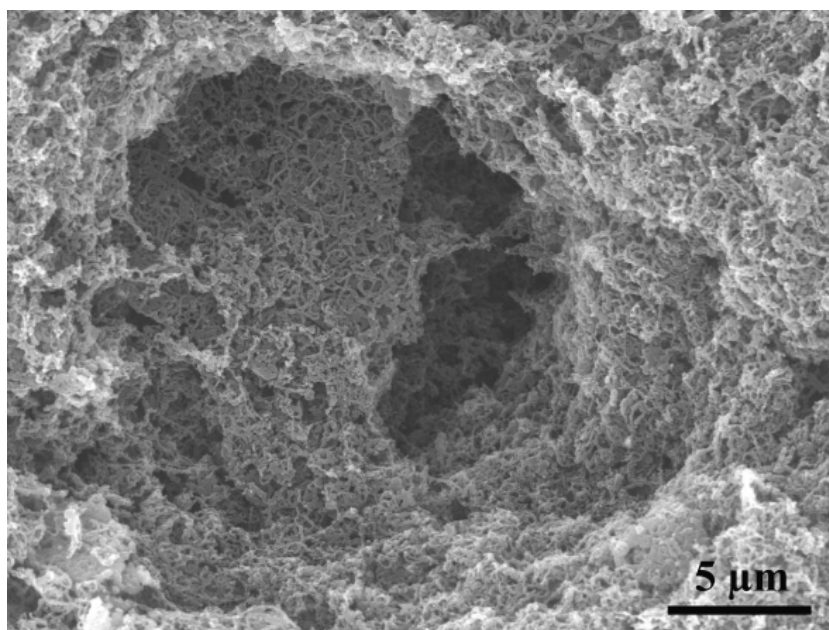

**Fig. S1.** SEM image of PPy-NWs network at a low magnification.

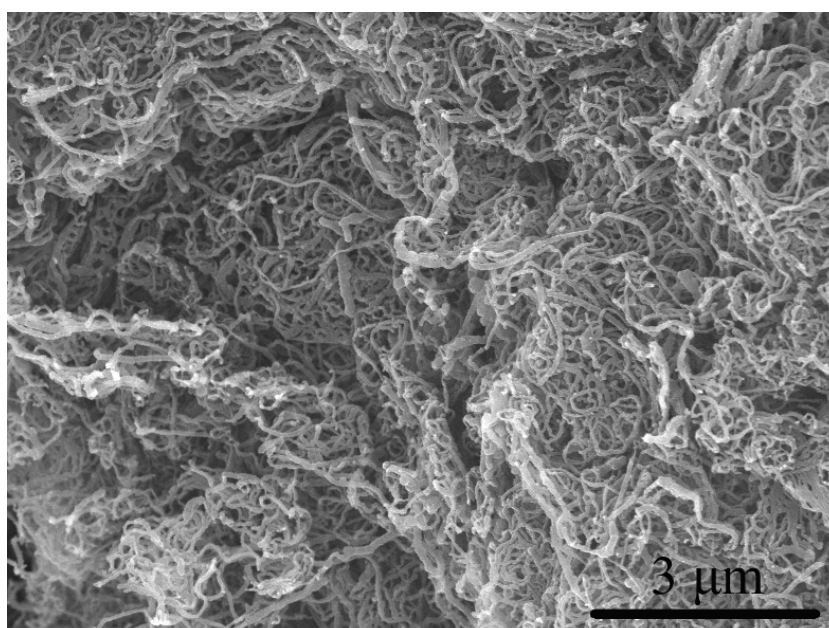

**Fig. S2.** SEM image of CPN-1 at a low magnification.

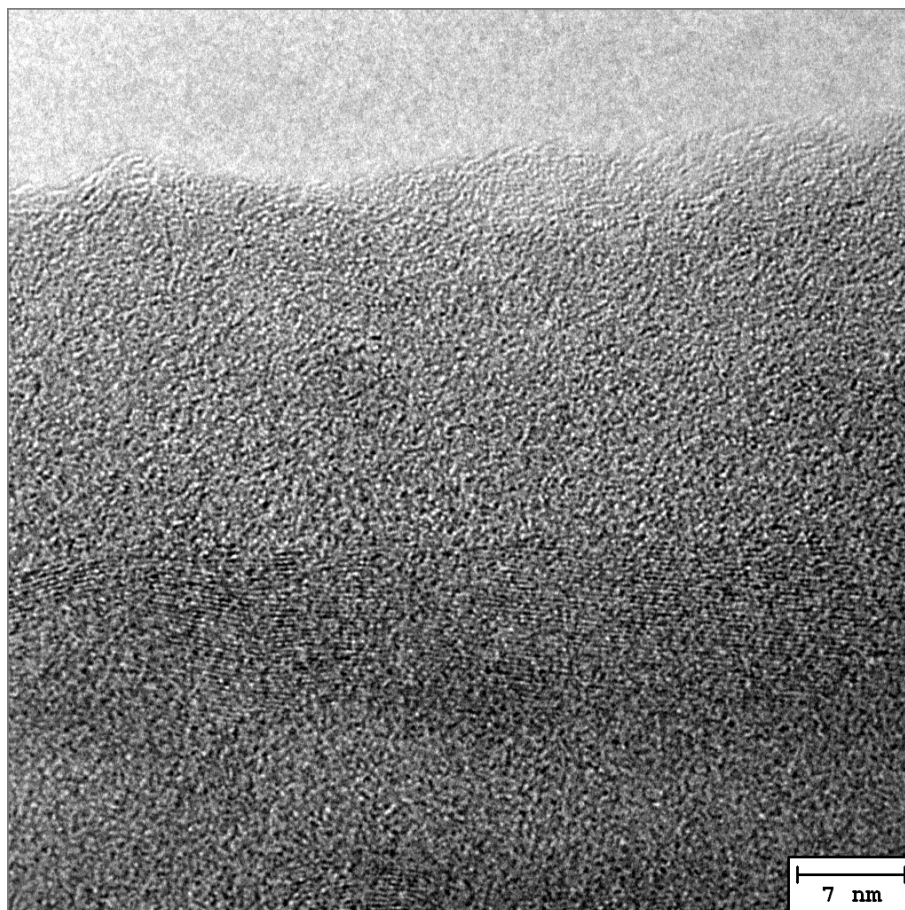

**Fig. S3.** HR-TEM image of CNT-embedded PPy nanowires network in CPN-1 sample.

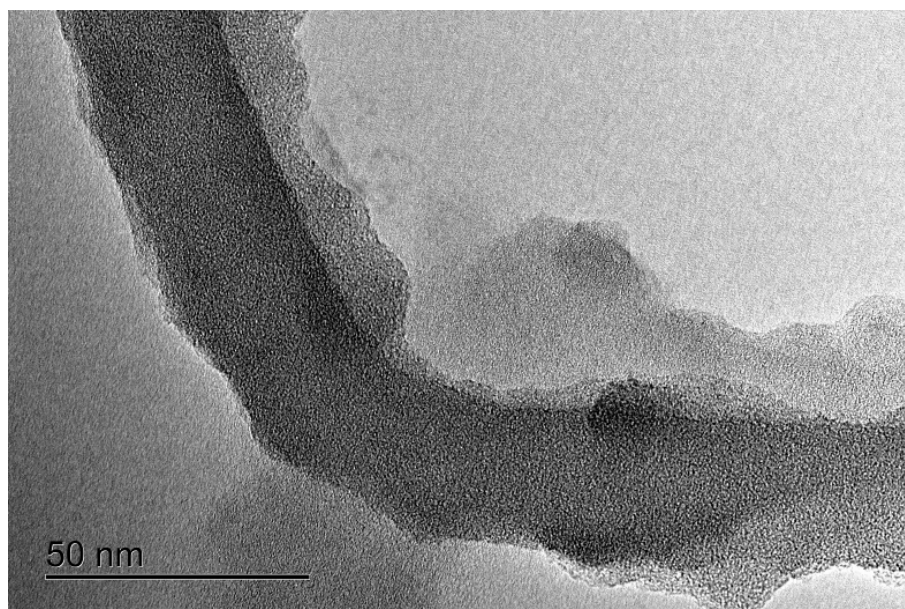

**Fig. S4.** TEM image of a single PPy nanowire in CPN-1 sample.



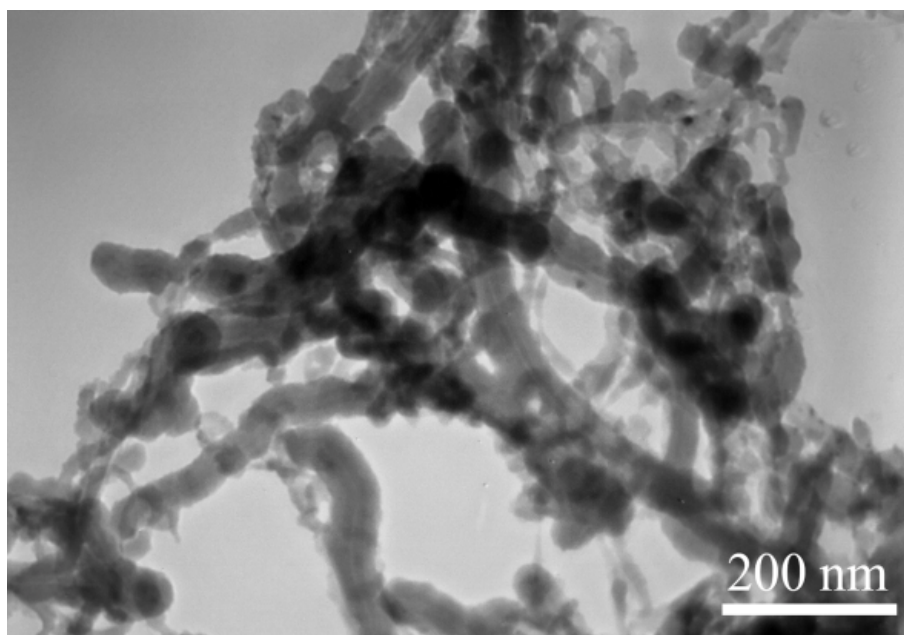

**Fig. S5.** TEM image of CPN-2 sample.

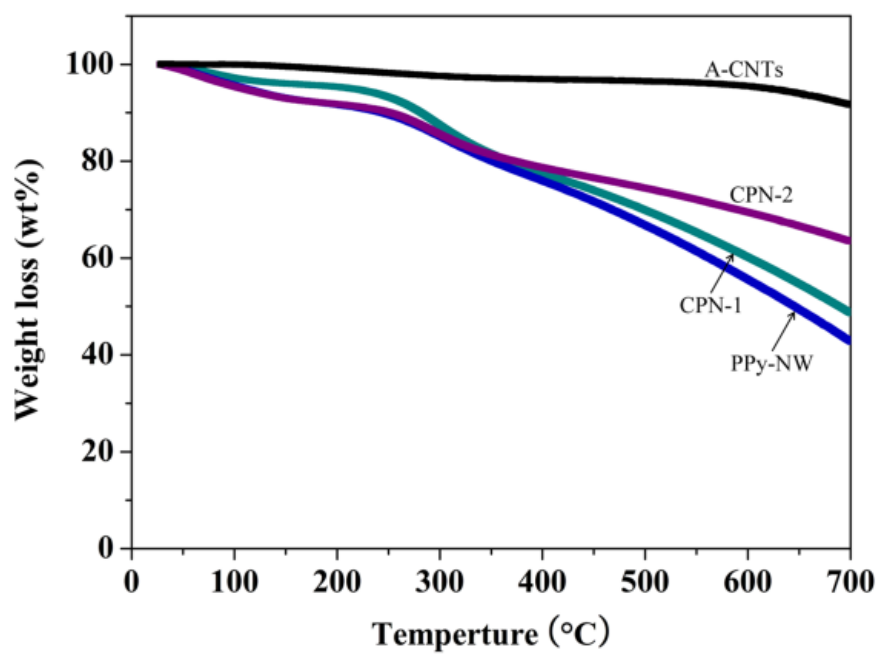

**Fig. S6.** TG curves of PPy-NW, CPN-1, CPN-2, and A-CNTs.

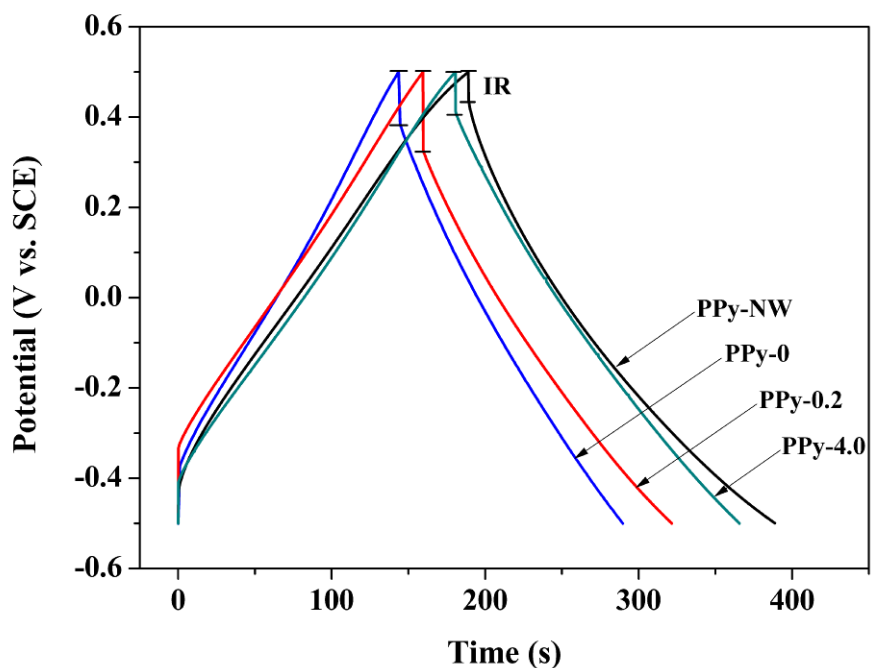

**Fig. S7.** Representative galvanostatic charge/discharge curves at a  $1 \text{ A g}^{-1}$  of current density of PPy-0, PPy-0.2, PPy-NW, and PPy-4.0 electrodes.

**Table S1.** Comparison of PPy-0, PPy-0.2, PPy-NW, and PPy-4.0 electrodes for specific capacitance ( $C_m$ ) and IR drop at a  $1 \text{ A g}^{-1}$  of current density.

| Samples               | PPy-0 | PPy-0.2 | PPy-NW | PPy-4.0 |
|-----------------------|-------|---------|--------|---------|
| $C_m/\text{F g}^{-1}$ | 147   | 163     | 201    | 186     |
| IR/v                  | 0.115 | 0.174   | 0.059  | 0.088   |

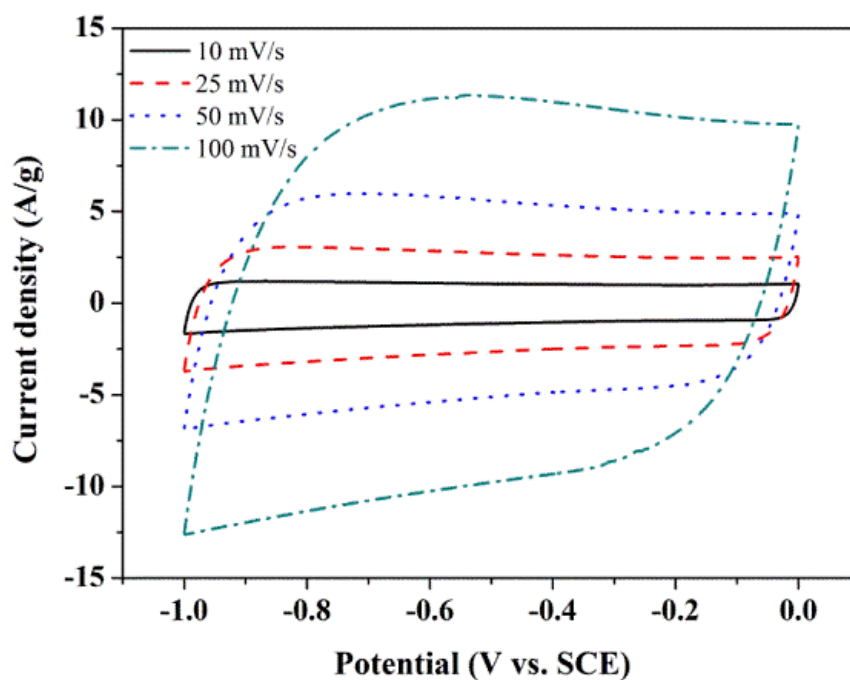

**Fig. S8.** Cyclic voltammograms of AC electrode at the different scan rates in 1 mol L<sup>-1</sup> KCl solution.

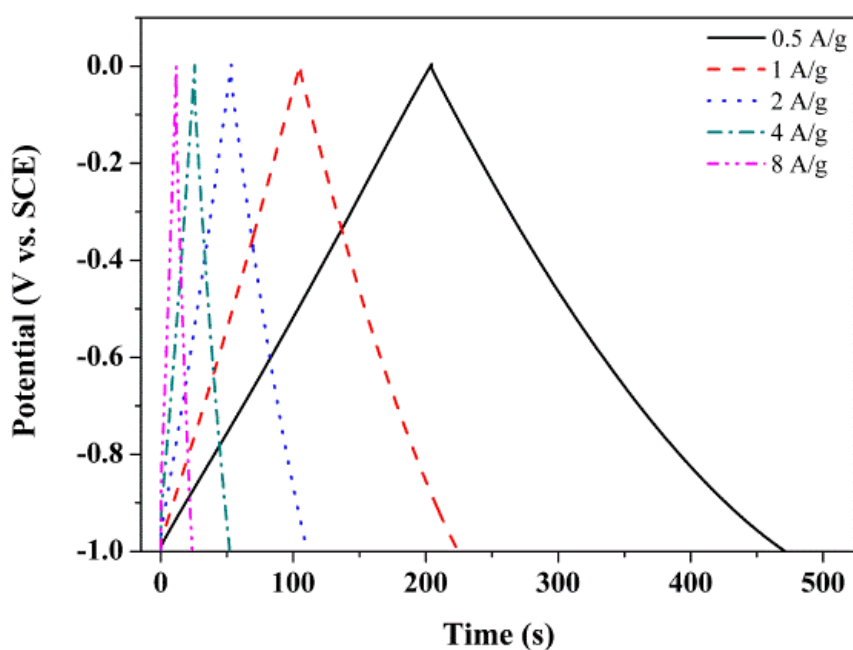

**Fig. S9.** Galvanostatic charge/discharge curves of AC electrode at the different current densities.
